# Supplementary material for: SAMM50-rs2073082, -rs738491 and -rs3761472 Interactions Enhancement of Susceptibility to Non-Alcoholic Fatty Liver Disease
Source: MDPI journal article supplement (doi:10.3390/biomedicines11092416), 2023-08-29
Supplement: s1 [file s1]

**Table S1.** Multiple comparison correction of LSM based on Table 4

| SNP              | $\beta$ | SE    | P-value |
|------------------|---------|-------|---------|
| <i>rs2073082</i> | -0.192  | 0.212 | 0.365   |
| <i>rs738491</i>  | 0.304   | 0.139 | 0.029   |
| <i>rs3761472</i> | 0.355   | 0.131 | 0.007   |

Multiple linear regression model was adjusted for age, gender, and body mass index.

**Table S2.** Association of *SAMM50 rs3761472* G allele carriers and non-carriers with TC,LDL after logistic regression model adjusted for sex, age, BMI and lipid-lowering agent

| Model 1              | OR (95% CI)        | P-value | Model 2              | OR (95% CI)        | P-value |
|----------------------|--------------------|---------|----------------------|--------------------|---------|
| Sex                  | 1.190(0.894,1.584) | 0.232   | Sex                  | 1.164(0.877,1.543) | 0.292   |
| Age                  | 0.980(0.957,1.005) | 0.115   | Age                  | 0.981(0.957,1.005) | 0.120   |
| BMI                  | 0.968(0.931,1.008) | 0.113   | BMI                  | 0.970(0.932,1.009) | 0.131   |
| lipid-lowering agent | 0.869(0.664,1.138) | 0.308   | lipid-lowering agent | 0.876(0.669,1.146) | 0.333   |
| TC                   | 0.873(0.782,0.976) | 0.017   | LDL                  | 0.871(0.772,0.982) | 0.024   |

BMI, body mass index; TC, total cholesterol.

**Table S3.** Comparison of clinical characteristics according to *SAMM50* genotypes within the whole population

|                         | <i>rs2073082</i> |           |          |         | <i>rs738491</i> |            |           |         | <i>rs3761472</i> |             |            |         |
|-------------------------|------------------|-----------|----------|---------|-----------------|------------|-----------|---------|------------------|-------------|------------|---------|
|                         | GG               | AG        | AA       | P-value | CC              | CT         | TT        | P-value | AA               | AG          | GG         | P-value |
| N                       | 441              | 497       | 115      |         | 325             | 521        | 207       |         | 415              | 515         | 123        |         |
|                         | 69.00            | 69.00     | 70.00    |         | 70.00           | 69.00      | 69.00     |         | 69.00            | 69.00       | 69.00      |         |
| Age(year)               | [67.00~74.0      | [67.00~73 | [67.00~7 | 0.096   | [67.00~75.      | [67.00~73. | [67.00~74 | 0.004   | [67.00~74.       | [67.00~74.0 | [67.00~73. | 0.151   |
|                         | 0]               | .00]      | 5.00]    |         | 00]             | 00]        | .00]      |         | 00]              | 0]          | 00]        |         |
| Male, n (%)             | 129              | 139       | 35       | 0.835   | 98              | 151        | 54        | 0.594   | 123              | 146         | 34         | 0.872   |
|                         | (29.25)          | (27.97)   | (30.43)  |         | (30.15)         | (28.98)    | (26.09)   |         | (29.64)          | (28.35)     | (27.64)    |         |
| Weight(Kg)              | 65.93 ±          | 65.48 ±   | 65.82 ±  | 0.796   | 65.93 ±         | 65.66 ±    | 65.46 ±   | 0.869   | 66.34 ±          | 65.17 ±     | 65.78 ±    | 0.222   |
|                         | 10.20            | 10.28     | 10.14    |         | 10.51           | 10.43      | 9.27      |         | 10.42            | 10.20       | 9.60       |         |
| BMI(Kg/m <sup>2</sup> ) | 25.80 ±          | 25.85 ±   | 25.70 ±  | 0.896   | 25.84 ±         | 25.85 ±    | 25.67 ±   | 0.769   | 25.98 ±          | 25.70 ±     | 25.73 ±    | 0.381   |
|                         | 3.14             | 3.26      | 2.98     |         | 3.27            | 3.22       | 2.94      |         | 3.26             | 3.17        | 2.87       |         |
| Systolic pressure       | 136.36 ±         | 134.06 ±  | 134.18   | 0.090   | 135.80 ±        | 133.63 ±   | 137.34 ±  | 0.015   | 135.45 ±         | 134.13 ±    | 137.38 ±   | 0.120   |
|                         | 19.70            | 13.61     | ± 13.97  |         | 20.08           | 13.78      | 16.22     |         | 19.27            | 13.89       | 16.01      |         |
| Diastolic pressure      | 79.00 ±          | 78.87 ±   | 78.33 ±  | 0.768   | 78.87 ±         | 78.69 ±    | 79.30 ±   | 0.697   | 79.00 ±          | 78.60 ±     | 79.51 ±    | 0.546   |
|                         | 9.56             | 8.13      | 7.79     |         | 9.24            | 8.44       | 8.60      |         | 9.28             | 8.36        | 8.23       |         |
| Waist circumference     | 88.75 ±          | 88.78 ±   | 88.61 ±  | 0.979   | 89.09 ±         | 88.73 ±    | 88.25 ±   | 0.520   | 89.07 ±          | 88.56 ±     | 88.45 ±    | 0.600   |
|                         | 7.99             | 8.52      | 8.10     |         | 8.59            | 8.38       | 7.34      |         | 8.51             | 8.34        | 6.91       |         |
| Hip circumference       | 98.45 ±          | 98.40 ±   | 98.68 ±  | 0.938   | 98.58 ±         | 98.53 ±    | 98.04 ±   | 0.673   | 98.77 ±          | 98.22 ±     | 98.33 ±    | 0.518   |
|                         | 7.36             | 7.51      | 7.17     |         | 7.50            | 7.51       | 6.98      |         | 7.52             | 7.39        | 7.03       |         |
| WHR                     | 0.90 ± 0.04      | 0.90 ±    | 0.90 ±   | 0.747   | 0.90 ±          | 0.90 ±     | 0.90 ±    | 0.560   | 0.90 ±           | 0.90 ±      | 0.90 ±     | 0.945   |

|                             |                    |                     |                     |               |                    |                    |                    |       |                    |                     |                    |       |
|-----------------------------|--------------------|---------------------|---------------------|---------------|--------------------|--------------------|--------------------|-------|--------------------|---------------------|--------------------|-------|
|                             |                    | 0.05                | 0.05                |               | 0.06               | 0.05               | 0.04               |       | 0.05               | 0.05                | 0.04               |       |
| CAP                         | 272.55 ± 49.16     | 275.01 ± 49.70      | 264.04 ± 47.78      | 0.156 (0.083) | 268.10 ± 48.03     | 277.40 ± 50.36     | 268.84 ± 47.91     | 0.024 | 271.60 ± 47.75     | 275.01 ± 50.13      | 268.23 ± 51.14     | 0.373 |
| LSM                         | 5.22 ± 2.19        | 4.94 ± 1.72         | 4.85 ± 2.00         | 0.083         | 4.84 ± 1.68        | 5.09 ± 1.91        | 5.25 ± 2.39        | 0.080 | 4.85 ± 1.78        | 5.11 ± 1.84         | 5.42 ± 2.78        | 0.021 |
| NFS                         | -0.68 [-1.40-0.12] | -0.79 [-1.48--0.15] | -0.92 [-1.49--0.08] | 0.135         | -0.76 [-1.46-0.09] | -0.74 [-1.44-0.10] | -0.74 [-1.48-0.04] | 0.918 | -0.73 [-1.44-0.07] | -0.79 [-1.46--0.07] | -0.72 [-1.55-0.03] | 0.617 |
| LSM≥8.2 Kpa, n (%)          | 29 (6.58)          | 24 (4.83)           | 4 (3.48)            | 0.273         | 12 (3.69)          | 29 (5.57)          | 16 (7.73)          | 0.133 | 18 (4.34)          | 26 (5.05)           | 13 (10.57)         | 0.024 |
| NFS≥-1.455, n (%)           | 292 (66.21)        | 305 (61.37)         | 69 (60.00)          | 0.361         | 214 (65.85)        | 319 (61.23)        | 133 (64.25)        | 0.950 | 265 (63.86)        | 326 (63.30)         | 75 (60.98)         | 0.933 |
| TBIL(umol/L)                | 15.97 ± 7.97       | 15.13 ± 5.77        | 14.98 ± 4.41        | 0.112         | 15.28 ± 5.66       | 15.33 ± 6.16       | 16.13 ± 8.99       | 0.281 | 15.32 ± 5.80       | 15.65 ± 7.35        | 15.21 ± 6.49       | 0.681 |
| TG (mmol/L)                 | 1.55 ± 1.08        | 1.63 ± 1.04         | 1.51 ± 0.92         | 0.395         | 1.56 ± 1.03        | 1.66 ± 1.12        | 1.44 ± 0.84        | 0.028 | 1.60 ± 1.08        | 1.60 ± 1.04         | 1.46 ± 0.94        | 0.394 |
| TC (mmol/L)                 | 4.74 ± 1.18        | 4.87 ± 1.29         | 4.89 ± 1.09         | 0.209         | 4.86 ± 1.15        | 4.84 ± 1.29        | 4.69 ± 1.19        | 0.260 | 4.92 ± 1.18        | 4.74 ± 1.27         | 4.80 ± 1.19        | 0.089 |
| HDL (mmol/L)                | 1.16 ± 0.26        | 1.15 ± 0.24         | 1.18 ± 0.27         | 0.391         | 1.18 ± 0.26        | 1.14 ± 0.25        | 1.16 ± 0.23        | 0.121 | 1.16 ± 0.25        | 1.15 ± 0.25         | 1.18 ± 0.25        | 0.402 |
| LDL (mmol/L)                | 3.27 ± 1.07        | 3.39 ± 1.18         | 3.41 ± 1.00         | 0.189         | 3.37 ± 1.05        | 3.37 ± 1.18        | 3.24 ± 1.06        | 0.360 | 3.44 ± 1.08        | 3.27 ± 1.16         | 3.33 ± 1.06        | 0.085 |
| ALT(U/L)                    | 19.83 ± 9.37       | 19.82 ± 9.27        | 19.03 ± 9.50        | 0.690         | 19.21 ± 8.73       | 20.11 ± 9.45       | 19.65 ± 9.94       | 0.385 | 19.52 ± 9.41       | 20.01 ± 9.41        | 19.38 ± 8.74       | 0.662 |
| AST(U/L)                    | 18.53 ± 7.76       | 18.52 ± 7.42        | 18.31 ± 6.67        | 0.961         | 18.21 ± 6.14       | 18.77 ± 7.74       | 18.28 ± 8.64       | 0.511 | 18.61 ± 7.26       | 18.37 ± 7.13        | 18.68 ± 9.43       | 0.856 |
| Hypertension, n (%)         | 349 (79.14)        | 373 (75.05)         | 88 (76.52)          | 0.291         | 249 (76.62)        | 398 (76.39)        | 163 (78.74)        | 0.891 | 322 (77.59)        | 388 (75.34)         | 100 (81.30)        | 0.471 |
| T2DM, n(%)                  | 195 (44.22)        | 203 (40.85)         | 43 (37.39)          | 0.332         | 130 (40.00)        | 225 (43.19)        | 86 (41.55)         | 0.661 | 174 (41.93)        | 217 (42.14)         | 50 (40.65)         | 0.946 |
| Stroke, n(%)                | 70 (15.87)         | 76 (15.29)          | 19 (16.52)          | 0.939         | 48 (14.77)         | 88 (16.89)         | 29 (14.01)         | 0.514 | 65 (15.66)         | 82 (15.92)          | 18 (14.63)         | 0.918 |
| METS, n(%)                  | 376 (85.26)        | 422 (84.91)         | 95 (82.61)          | 0.777         | 272 (83.69)        | 446 (85.60)        | 175 (84.54)        | 0.748 | 354 (85.30)        | 434 (84.27)         | 105 (85.37)        | 0.895 |
| Lipid lowering agent, n (%) | 160 (36.28)        | 158 (31.79)         | 37 (32.17)          | 0.308         | 113 (34.77)        | 167 (32.05)        | 75 (36.23)         | 0.540 | 145 (34.94)        | 171 (33.20)         | 39 (31.71)         | 0.828 |

BMI, body mass index; WHR, Waist-to-hip ratio; CAP, controlled attenuated parameter controlled; LSM, liver stiffness measurement; NFS, NAFLD Fibrosis Score; TBIL, total bilirubin; TG, total triglyceride; TC, total cholesterol; HDL, high-density lipoprotein; LDL, low-density lipoprotein; ALT, alanine aminotransferase; AST, aspartate aminotransferase; T2DM, type 2 diabetes; Mets, metabolic syndrome.

**Table S4.** Multiple comparison correction of LSM based on Table S3

| SNP              | $\beta$ | SE    | P-value |
|------------------|---------|-------|---------|
| <i>rs2073082</i> | -0.226  | 0.099 | 0.022   |
| <i>rs738491</i>  | 0.219   | 0.091 | 0.016   |
| <i>rs3761472</i> | 0.298   | 0.097 | 0.002   |

Multiple linear regression model was adjusted for age, gender, and body mass index.

**Table S5.** Comparison of clinical characteristics according to SAMM50 genotypes within NAFLD cohorts

|                         | <i>rs2073082</i>   |                     |                    |         | <i>rs738491</i>    |                     |                     |         | <i>rs3761472</i>   |                     |                    |         |
|-------------------------|--------------------|---------------------|--------------------|---------|--------------------|---------------------|---------------------|---------|--------------------|---------------------|--------------------|---------|
|                         | GG                 | AG                  | AA                 | P-value | CC                 | CT                  | TT                  | P-value | AA                 | AG                  | GG                 | P-value |
| N                       | 242                | 299                 | 49                 |         | 161                | 312                 | 117                 |         | 230                | 290                 | 70                 |         |
|                         | 69.00              | 68.00               | 70.00              |         | 70.00              | 68.00               | 69.00               |         | 69.00              | 68.00               | 69.00              |         |
| Age(year)               | [66.00~73.00]      | [67.00~72.00]       | [66.50~74.50]      | 0.497   | [67.00~74.00]      | [67.00~72.00]       | [66.00~72.00]       | 0.037   | [67.00~74.00]      | [66.00~73.00]       | [66.00~71.00]      | 0.077   |
| Male, n (%)             | 63 (26.03)         | 69 (23.08)          | 17 (34.69)         | 0.208   | 44 (27.33)         | 80 (25.64)          | 25 (21.37)          | 0.515   | 60 (26.09)         | 72 (24.83)          | 17 (24.29)         | 0.929   |
| Weight(Kg)              | 67.76 ± 10.67      | 68.43 ± 10.01       | 70.27 ± 10.38      | 0.288   | 69.11 ± 10.18      | 68.23 ± 10.62       | 67.41 ± 9.69        | 0.389   | 69.22 ± 10.23      | 67.71 ± 10.44       | 67.78 ± 10.06      | 0.228   |
| BMI(Kg/m <sup>2</sup> ) | 26.68 ± 3.03       | 27.01 ± 3.16        | 27.22 ± 2.53       | 0.329   | 27.05 ± 2.98       | 26.93 ± 3.18        | 26.55 ± 2.84        | 0.372   | 27.12 ± 3.04       | 26.79 ± 3.11        | 26.53 ± 2.86       | 0.272   |
| Systolic pressure       | 137.54 ± 22.36     | 135.39 ± 13.73      | 134.75 ± 13.22     | 0.320   | 137.58 ± 24.70     | 134.61 ± 13.31      | 138.57 ± 16.16      | 0.064   | 137.20 ± 22.37     | 134.90 ± 13.23      | 138.32 ± 16.15     | 0.200   |
| Diastolic pressure      | 79.62 ± 10.49      | 79.39 ± 8.33        | 79.10 ± 7.71       | 0.923   | 78.62 ± 10.59      | 79.61 ± 8.60        | 80.22 ± 8.71        | 0.335   | 79.28 ± 10.40      | 79.42 ± 8.40        | 80.20 ± 8.19       | 0.763   |
| Waist circumference     | 90.77 ± 7.62       | 91.25 ± 8.13        | 91.98 ± 7.94       | 0.575   | 91.99 ± 8.19       | 90.97 ± 8.03        | 90.31 ± 7.10        | 0.198   | 91.79 ± 8.08       | 90.73 ± 8.04        | 90.46 ± 6.62       | 0.242   |
| Hip circumference       | 99.83 ± 7.29       | 100.73 ± 7.14       | 100.35 ± 6.58      | 0.356   | 100.65 ± 7.00      | 100.42 ± 7.34       | 99.67 ± 6.89        | 0.513   | 100.84 ± 7.18      | 100.10 ± 7.16       | 99.58 ± 7.05       | 0.329   |
| WHR                     | 0.91 ± 0.04        | 0.91 ± 0.05         | 0.92 ± 0.05        | 0.329   | 0.91 ± 0.05        | 0.91 ± 0.05         | 0.91 ± 0.04         | 0.231   | 0.91 ± 0.05        | 0.91 ± 0.05         | 0.91 ± 0.04        | 0.692   |
| CAP                     | 293.87 ± 41.67     | 296.52 ± 40.14      | 293.49 ± 45.30     | 0.758   | 291.94 ± 43.67     | 299.00 ± 39.28      | 289.67 ± 41.68      | 0.080   | 294.42 ± 40.99     | 296.59 ± 40.02      | 292.11 ± 46.15     | 0.705   |
| LSM                     | 5.57 ± 2.16        | 5.31 ± 1.76         | 5.64 ± 2.48        | 0.306   | 5.31 ± 1.87        | 5.41 ± 1.80         | 5.70 ± 2.54         | 0.318   | 5.33 ± 1.94        | 5.43 ± 1.76         | 5.88 ± 2.86        | 0.162   |
| NFS                     | -0.69 [-1.42-0.01] | -0.74 [-1.37--0.20] | -0.97 [-1.48-0.00] | 0.756   | -0.75 [-1.39-0.20] | -0.69 [-1.38--0.01] | -0.75 [-1.55--0.06] | 0.727   | -0.71 [-1.38-0.03] | -0.78 [-1.42--0.20] | -0.72 [-1.55-0.10] | 0.311   |
| LSM≥8.2 Kpa, n (%)      | 20 (8.26)          | 20 (6.69)           | 3 (6.12)           | 0.694   | 10 (6.21)          | 21 (6.73)           | 12 (10.26)          | 0.415   | 16 (6.96)          | 18 (6.21)           | 9 (12.86)          | 0.154   |
| NFS≥-1.455              | 148 (61.16)        | 180 (60.20)         | 26 (53.06)         | 0.457   | 105 (65.22)        | 183 (58.65)         | 66 (56.41)          | 0.372   | 142 (61.74)        | 173 (59.66)         | 39 (55.71)         | 0.766   |

|                             |               |              |               |       |              |              |               |       |               |               |               |       |
|-----------------------------|---------------|--------------|---------------|-------|--------------|--------------|---------------|-------|---------------|---------------|---------------|-------|
| TBIL(umol/L)                | 16.38 ± 9.41  | 15.08 ± 5.83 | 15.51 ± 4.93  | 0.133 | 15.43 ± 6.41 | 15.30 ± 6.06 | 16.88 ± 11.24 | 0.136 | 15.42 ± 6.63  | 15.90 ± 8.23  | 15.36 ± 6.81  | 0.728 |
|                             |               |              |               |       |              |              |               |       |               |               |               |       |
| TG (mmol/L)                 | 1.78 ± 1.25   | 1.78 ± 1.09  | 1.78 ± 1.19   | 0.996 | 1.78 ± 1.18  | 1.85 ± 1.22  | 1.60 ± 0.97   | 0.150 | 1.81 ± 1.22   | 1.79 ± 1.13   | 1.67 ± 1.14   | 0.687 |
|                             |               |              |               |       |              |              |               |       |               |               |               |       |
| TC (mmol/L)                 | 4.65 ± 1.14   | 4.95 ± 1.37  | 4.85 ± 1.22   | 0.024 | 4.85 ± 1.20  | 4.86 ± 1.35  | 4.65 ± 1.16   | 0.306 | 4.90 ± 1.22   | 4.77 ± 1.32   | 4.73 ± 1.24   | 0.424 |
|                             |               |              |               |       |              |              |               |       |               |               |               |       |
| HDL (mmol/L)                | 1.11 ± 0.23   | 1.13 ± 0.21  | 1.10 ± 0.25   | 0.456 | 1.13 ± 0.24  | 1.10 ± 0.22  | 1.13 ± 0.21   | 0.228 | 1.11 ± 0.22   | 1.12 ± 0.23   | 1.13 ± 0.22   | 0.803 |
|                             |               |              |               |       |              |              |               |       |               |               |               |       |
| LDL (mmol/L)                | 3.18 ± 1.00   | 3.46 ± 1.27  | 3.40 ± 1.09   | 0.019 | 3.36 ± 1.07  | 3.39 ± 1.24  | 3.20 ± 1.03   | 0.329 | 3.43 ± 1.09   | 3.29 ± 1.22   | 3.26 ± 1.09   | 0.363 |
|                             |               |              |               |       |              |              |               |       |               |               |               |       |
| ALT(U/L)                    | 21.45 ± 10.51 | 21.24 ± 9.45 | 23.04 ± 12.21 | 0.514 | 21.11 ± 9.67 | 21.58 ± 9.92 | 21.71 ± 11.36 | 0.859 | 21.22 ± 10.38 | 21.46 ± 10.09 | 22.36 ± 9.67  | 0.716 |
|                             |               |              |               |       |              |              |               |       |               |               |               |       |
| AST(U/L)                    | 19.33 ± 8.90  | 19.19 ± 8.30 | 20.55 ± 8.68  | 0.587 | 19.12 ± 7.19 | 19.37 ± 8.48 | 19.68 ± 10.43 | 0.867 | 19.46 ± 8.40  | 18.96 ± 7.85  | 20.70 ± 11.52 | 0.305 |
|                             |               |              |               |       |              |              |               |       |               |               |               |       |
| Hypertension, n (%)         | 193 (79.75)   | 230 (76.92)  | 42 (85.71)    | 0.278 | 128 (79.50)  | 246 (78.85)  | 91 (77.78)    | 0.849 | 187 (81.30)   | 219 (75.52)   | 59 (84.29)    | 0.240 |
|                             |               |              |               |       |              |              |               |       |               |               |               |       |
| T2DM, n(%)                  | 116 (47.93)   | 135 (45.15)  | 21 (42.85)    | 0.725 | 73 (45.34)   | 146 (46.79)  | 53 (45.30)    | 0.938 | 109 (47.39)   | 129 (44.48)   | 34 (48.57)    | 0.729 |
|                             |               |              |               |       |              |              |               |       |               |               |               |       |
| Stroke, n(%)                | 39 (16.12)    | 47 (15.72)   | 6 (12.24)     | 0.790 | 23 (14.29)   | 53 (16.99)   | 16 (13.68)    | 0.578 | 36 (15.65)    | 45 (15.52)    | 11 (15.71)    | 0.999 |
|                             |               |              |               |       |              |              |               |       |               |               |               |       |
| METS, n(%)                  | 218 (90.08)   | 275 (91.97)  | 44 (89.80)    | 0.711 | 143 (88.82)  | 292 (93.59)  | 102 (87.18)   | 0.061 | 212 (92.17)   | 263 (90.69)   | 62 (88.57)    | 0.629 |
|                             |               |              |               |       |              |              |               |       |               |               |               |       |
| Lipid lowering agent, n (%) | 78 (32.23)    | 96 (32.11)   | 17 (34.69)    | 0.931 | 54 (33.54)   | 100 (32.05)  | 37 (31.62)    | 0.936 | 80 (34.78)    | 89 (30.69)    | 22 (31.43)    | 0.722 |
|                             |               |              |               |       |              |              |               |       |               |               |               |       |

BMI, body mass index; WHR, Waist-to-hip ratio; CAP, controlled attenuated parameter controlled; LSM, liver stiffness measurement; NFS, NAFLD Fibrosis Score; TBIL, total bilirubin; TG, total triglyceride; TC, total cholesterol; HDL, high-density lipoprotein; LDL, low-density lipoprotein; ALT, alanine aminotransferase; AST, aspartate aminotransferase; T2DM, type 2 diabetes; Mets, metabolic syndrome.

**Table S6.** Comparison of clinical characteristics according to SAMM50 genotypes within NAFLD cohorts (Carriers Vs Noncarriers)

|                    | <i>rs2073082</i>       |                        |                | <i>rs738491</i>        |                        |                | <i>rs3761472</i>       |                        |                |
|--------------------|------------------------|------------------------|----------------|------------------------|------------------------|----------------|------------------------|------------------------|----------------|
|                    | <i>Carriers(GG+AG)</i> | <i>Noncarriers(AA)</i> | <i>P-value</i> | <i>Carriers(TT+CT)</i> | <i>Noncarriers(CC)</i> | <i>P-value</i> | <i>Carriers(GG+AG)</i> | <i>Noncarriers(AA)</i> | <i>P-value</i> |
| N                  | 541                    | 49                     |                | 429                    | 161                    |                | 360                    | 230                    |                |
| Age(year)          | 69.00                  | 69.00                  | 0.316          | 68.00                  | 70.00                  | 0.010          | 68.00 [66.00~72.00]    | 69.00 [67.00~74.00]    | 0.026          |
|                    | [66.00~73.00]          | [67.00~73.00]          |                | [66.00~72.00]          | [67.00~74.00]          |                |                        |                        |                |
| Male, n (%)        | 132 (24.40)            | 17 (34.69)             | 0.112          | 105 (24.48)            | 44 (27.33)             | 0.477          | 89 (24.72)             | 60 (26.09)             | 0.710          |
| Weight(Kg)         | 68.13 ± 10.31          | 70.27 ± 10.38          | 0.165          | 68.00 ± 10.37          | 69.11 ± 10.18          | 0.245          | 67.72 ± 10.35          | 69.22 ± 10.23          | 0.086          |
| BMI(Kg/m2)         | 26.86 ± 3.10           | 27.22 ± 2.53           | 0.434          | 26.83 ± 3.09           | 27.05 ± 2.98           | 0.425          | 26.74 ± 3.06           | 27.12 ± 3.04           | 0.137          |
| Systolic pressure  | 136.35 ± 18.09         | 134.75 ± 13.22         | 0.550          | 135.70 ± 14.25         | 137.58 ± 24.70         | 0.256          | 135.57 ± 13.89         | 137.20 ± 22.37         | 0.282          |
| Diastolic pressure | 79.49 ± 9.34           | 79.10 ± 7.71           | 0.782          | 79.78 ± 8.63           | 78.62 ± 10.59          | 0.177          | 79.57 ± 8.36           | 79.28 ± 10.40          | 0.707          |
| Waist              | 91.04 ± 7.91           | 91.98 ± 7.94           | 0.431          | 90.79 ± 7.78           | 91.99 ± 8.19           | 0.103          | 90.68 ± 7.77           | 91.79 ± 8.08           | 0.096          |

|                             |                     |                    |       |                     |                    |       |                     |                    |       |
|-----------------------------|---------------------|--------------------|-------|---------------------|--------------------|-------|---------------------|--------------------|-------|
| circumference               |                     |                    |       |                     |                    |       |                     |                    |       |
| Hip circumference           | 100.33 ± 7.21       | 100.35 ± 6.58      | 0.981 | 100.21 ± 7.22       | 100.65 ± 7.00      | 0.513 | 100.00 ± 7.13       | 100.84 ± 7.18      | 0.164 |
| WHR                         | 0.91 ± 0.05         | 0.92 ± 0.05        | 0.212 | 0.91 ± 0.05         | 0.91 ± 0.05        | 0.087 | 0.91 ± 0.05         | 0.91 ± 0.05        | 0.456 |
| LSM                         | 5.43 ± 1.95         | 5.64 ± 2.48        | 0.526 | 5.49 ± 2.03         | 5.31 ± 1.87        | 0.367 | 5.52 ± 2.02         | 5.33 ± 1.94        | 0.306 |
| CAP                         | 295.37 ± 40.79      | 293.49 ± 45.30     | 0.784 | 296.43 ± 40.12      | 291.94 ± 43.67     | 0.275 | 295.72 ± 41.24      | 294.42 ± 40.99     | 0.729 |
| NFS                         | -0.73 [-1.40--0.06] | -0.97 [-1.48-0.00] | 0.814 | -0.72 [-1.41--0.13] | -0.75 [-1.39-0.23] | 0.476 | -0.75 [-1.43--0.12] | -0.71 [-1.38-0.03] | 0.209 |
| LSM≥8.2 Kpa, n (%)          | 40 (7.39)           | 3 (6.12)           | 0.863 | 33 (7.70)           | 10 (6.21)          | 0.577 | 27 (7.50)           | 16 (6.96)          | 0.863 |
| NFS≥-1.455                  | 328 (60.63)         | 26 (53.06)         | 0.355 | 249 (58.04)         | 105 (65.22)        | 0.538 | 212 (58.89)         | 142 (61.74)        | 0.523 |
| TBIL(umol/L)                | 15.66 ± 7.66        | 15.51 ± 4.93       | 0.888 | 15.73 ± 7.84        | 15.43 ± 6.41       | 0.668 | 15.79 ± 7.97        | 15.42 ± 6.63       | 0.556 |
| TG (mmol/L)                 | 1.78 ± 1.16         | 1.78 ± 1.19        | 0.983 | 1.78 ± 1.16         | 1.78 ± 1.18        | 0.977 | 1.76 ± 1.13         | 1.81 ± 1.22        | 0.670 |
| TC (mmol/L)                 | 4.81 ± 1.28         | 4.85 ± 1.22        | 0.828 | 4.80 ± 1.30         | 4.85 ± 1.20        | 0.692 | 4.76 ± 1.30         | 4.90 ± 1.22        | 0.197 |
| HDL (mmol/L)                | 1.12 ± 0.22         | 1.10 ± 0.25        | 0.502 | 1.11 ± 0.22         | 1.13 ± 0.24        | 0.260 | 1.12 ± 0.22         | 1.11 ± 0.22        | 0.757 |
| LDL (mmol/L)                | 3.34 ± 1.16         | 3.40 ± 1.09        | 0.710 | 3.33 ± 1.19         | 3.36 ± 1.07        | 0.811 | 3.29 ± 1.19         | 3.43 ± 1.09        | 0.158 |
| ALT(U/L)                    | 21.33 ± 9.94        | 23.04 ± 12.21      | 0.259 | 21.61 ± 10.32       | 21.11 ± 9.67       | 0.591 | 21.63 ± 10.00       | 21.22 ± 10.38      | 0.634 |
| AST(U/L)                    | 19.25 ± 8.56        | 20.55 ± 8.68       | 0.311 | 19.45 ± 9.04        | 19.12 ± 7.19       | 0.674 | 19.30 ± 8.69        | 19.46 ± 8.40       | 0.817 |
| Hypertension, n (%)         | 423 (78.19)         | 42 (85.71)         | 0.191 | 337 (78.55)         | 128 (79.50)        | 0.795 | 278 (797.22)        | 187 (81.30)        | 0.405 |
| T2DM, n(%)                  | 251 (46.40)         | 21 (42.86)         | 0.634 | 199 (46.39)         | 73 (45.34)         | 0.821 | 163 (45.27)         | 109 (47.39)        | 0.615 |
| Stroke, n(%)                | 86 (15.90)          | 6 (12.24)          | 0.502 | 69 (16.08)          | 23 (14.29)         | 0.591 | 56 (15.56)          | 36 (15.65)         | 0.958 |
| METS, n(%)                  | 493 (91.13)         | 44 (89.80)         | 0.755 | 394 (91.84)         | 143 (88.82)        | 0.253 | 325 (90.28)         | 212 (92.17)        | 0.432 |
| Lipid lowering agent, n (%) | 174 (32.16)         | 17 (34.69)         | 0.709 | 137 (31.93)         | 54 (33.54)         | 0.759 | 111 (30.83)         | 80 (34.78)         | 0.420 |

BMI, body mass index; WHR, Waist-to-hip ratio; CAP, controlled attenuated parameter controlled; LSM, liver stiffness measurement; NFS, NAFLD Fibrosis Score; TBIL,total bilirubin; TG, total triglyceride; TC, total cholesterol; HDL, high-density lipoprotein; LDL, low-density lipoprotein; ALT, alanine aminotransferase; AST, aspartate aminotransferase; T2DM, type 2 diabetes; Mets, metabolic syndrome.
